# Supplementary material
Source: PubMed Central journal article supplement (PMC4286499)

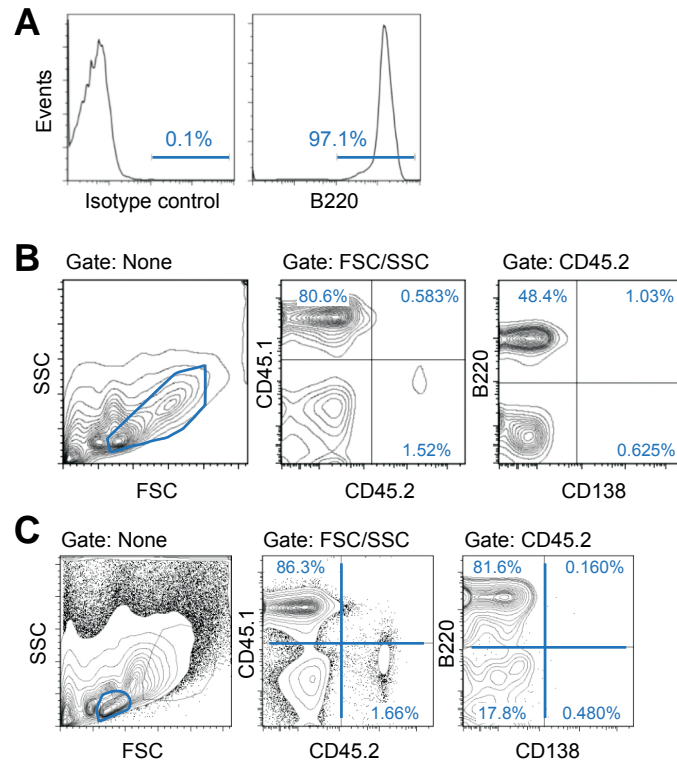

Supplement: NIHMS638977-supplement-Supp_Fig_1.pdf [file NIHMS638977-supplement-Supp_Fig_1.pdf]

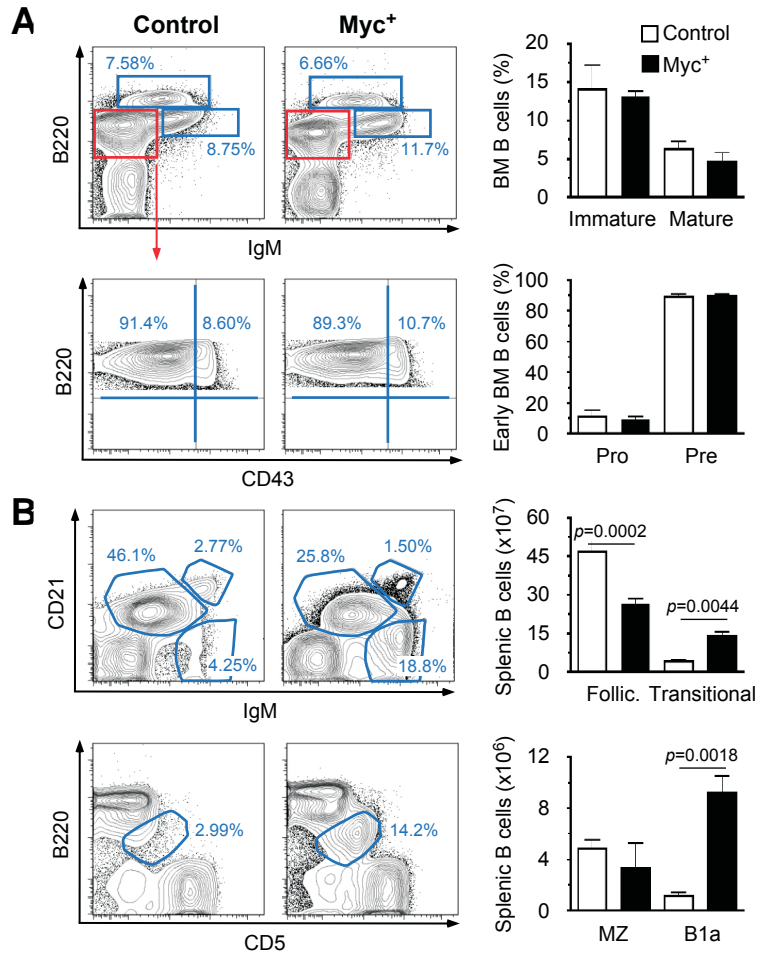

Supplemental Figure 2

Supplement: NIHMS638977-supplement-Supp_Fig_2.pdf [file NIHMS638977-supplement-Supp_Fig_2.pdf]

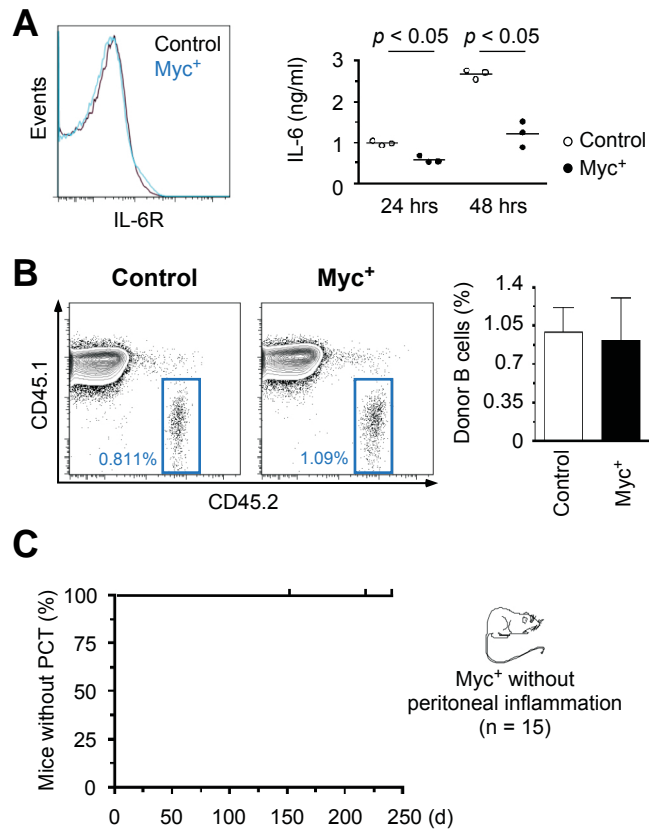

Supplement: NIHMS638977-supplement-Supp_Fig_3.pdf [file NIHMS638977-supplement-Supp_Fig_3.pdf]

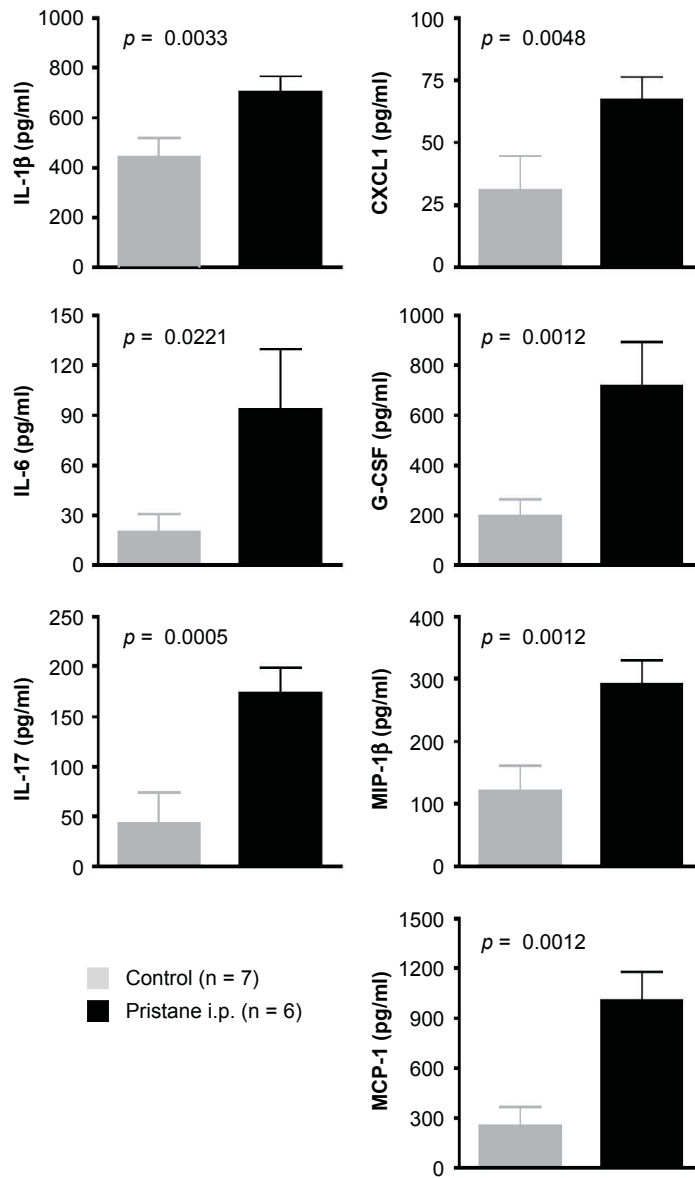

Supplement: NIHMS638977-supplement-Supp_Fig_4.pdf [file NIHMS638977-supplement-Supp_Fig_4.pdf]

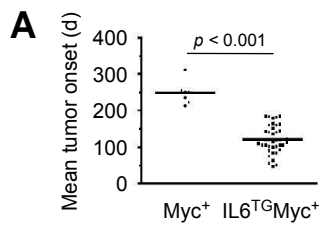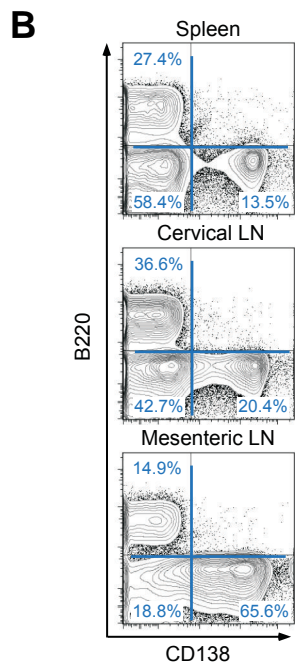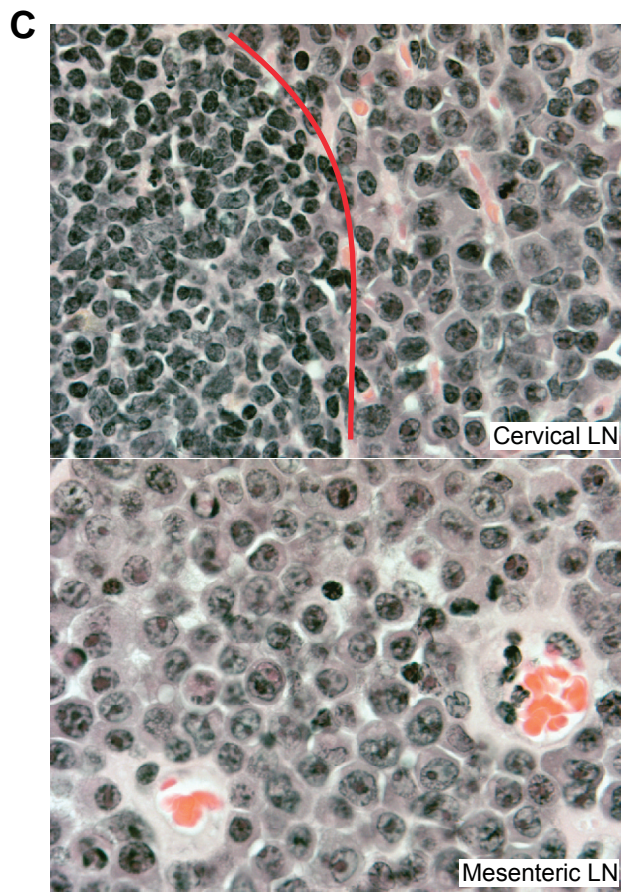

Supplement: NIHMS638977-supplement-Supp_Fig_5.pdf [file NIHMS638977-supplement-Supp_Fig_5.pdf]
